# Supplementary material
Source: bioRxiv or medRxiv preprint supplement (https://medrxiv.org/highwire/filestream/73984/field_highwire_adjunct_files/0/2020.03.17.20037770-1.pdf)
Supplement: Supplementary file [file 2020.03.17.20037770-1.pdf]

## Supplementary Materials:

### Data Sources:

Table S1. Summarizes the sources of data used in this study.

**Table S1. Data sources**

| Data                                           | Source                                                                | Date of latest available data                |
|------------------------------------------------|-----------------------------------------------------------------------|----------------------------------------------|
| Aviation: T-100 Domestic Market (All Carriers) | Bureau of Transportation Statistics (1)                               | August 2019                                  |
| State Population                               | United States Census Bureau (2)                                       | 2019 (projected from data collected in 2010) |
| State Demographic Composition                  | United States Census Bureau (3)                                       | 2018                                         |
| State-wise Uninsured Population                | United States Census Bureau (4)                                       | 2018                                         |
| State-wise Liquid Asset Poverty Rate           | Prosperity Now Scorecard (5)                                          | 2016                                         |
| Confirmed Existing COVID-19 Cases in the US    | An interactive web-based dashboard to track COVID-19 in real time (6) | 2020                                         |
| American Travel Survey                         | Bureau of Transportation Statistics (7)                               | 1995                                         |

### Derivation of P-matrix and Total Passenger Flux:

The matrix of passenger fluxes ( $\mathbf{P}$ ) was derived in the same manner as Brockmann and Helbing (8). Aviation data was first gathered from the United States Bureau of Transportation Statistics (1). This data included the number of passengers, origin, destination, and flight month. This information was sorted by month and arranged into an  $n \times m$  matrix containing the total number of passengers traveling from state  $n$  to state  $m$  (where in this case  $n=m=52$ ). The values stored within  $\mathbf{P}$  were then normalized by the total passenger flux to  $m$  ( $F_{nm}$ ), such that the value of  $\mathbf{P}$  gives the probability that a passenger arriving to state  $m$  originated in state  $n$ . The daily total passenger flux  $\phi$  of the air traffic network for each month is then calculated by taking the sum of  $F_{nm}$  and dividing by the number of days in the month. All sources for data used to determine  $\mathbf{P}$  can be found in Table S1.

### Ground Based Traffic Volume

The 1995 American Travel Survey (ATS) is the most recent available data regarding the movement of passengers from state to state via ground transportation. The ATS was conducted to gather information on household trips of over 100 miles. This data was used to estimate interstate passenger flux via ground transportation. When this data is compared with air traffic, it was found that the daily passenger flux of the ground traffic was less than 1% of the total passenger flux of air traffic.

### Domestic Traffic Volume:

Figure 1 in the maintext shows the population-weighted interstate air traffic for each state. The traffic between states was calculated as a first order function of the total flux of passengers from state  $n$  to state  $m$ , and the total population of state  $m$  using the equation

$$\text{population-weighted traffic} \propto \left[ \frac{(1-F_{ij})^\kappa}{\sum_{i=1}^M (1-F_{ij})^\kappa F_{ij}} \right] \left[ \frac{(1-Q_j)^\kappa}{\sum_{j=1}^M (1-Q_j)^\kappa Q_j} \right]$$

Where  $F_{ij}$  is the passenger flux from state  $i$  to state  $j$  (as described above),  $Q_j$  is the fraction of total population residing in state  $j$ , and  $\kappa$  is the order of the multiplier (equal to one for this case).

High traffic (white lines in Figure 1) indicates a large number of people traveling from state  $i$  to state  $j$ , relative to the total population of state  $j$ . The traffic is then normalized by its maximum value, and shown in Figure 1.

### **Initial Conditions for the SEIR Model**

This section outlines the tabulated active cases of COVID-19 in the US, as confirmed on March 2, 5, 9, 11, 12, 13, 14, 15, 16. These datasets served as the initial conditions for the SEIR model.

**Table S2. Confirmed active cases of COVID-19 in the US**

#### **March 2, 2020**

| State | Active cases | State | Active cases | State | Active cases |
|-------|--------------|-------|--------------|-------|--------------|
| CA    | 13           | NY    | 1            | TX    | 1            |
| FL    | 2            | OR    | 2            | WA    | 10           |
| IL    | 1            | RI    | 2            | WI    | 1            |

#### **March 5, 2020**

| State | Active cases | State | Active cases | State | Active cases | State | Active cases | State | Active cases |
|-------|--------------|-------|--------------|-------|--------------|-------|--------------|-------|--------------|
| WA    | 65           | NV    | 1            | IL    | 3            | FL    | 4            | RI    | 2            |
| OR    | 3            | AZ    | 1            | TN    | 1            | NC    | 1            | MA    | 1            |
| CA    | 42           | TX    | 2            | GA    | 2            | NY    | 25           | NH    | 2            |

#### **March 9, 2020**

| State | Active cases | State | Active cases | State | Active cases | State | Active cases | State | Active cases |
|-------|--------------|-------|--------------|-------|--------------|-------|--------------|-------|--------------|
| AZ    | 4            | HI    | 2            | MA    | 22           | NJ    | 5            | SC    | 6            |
| CA    | 122          | IA    | 3            | MD    | 5            | NV    | 4            | TN    | 3            |
| CO    | 8            | IL    | 5            | MN    | 2            | NY    | 140          | TX    | 14           |
| CT    | 1            | IN    | 3            | MO    | 1            | OK    | 1            | UT    | 1            |
| DC    | 2            | KS    | 1            | NC    | 2            | OR    | 14           | VA    | 2            |
| FL    | 12           | KY    | 4            | NE    | 3            | PA    | 7            | VT    | 1            |
| GA    | 10           | LA    | 1            | NH    | 5            | RI    | 3            | WA    | 108          |

#### **March 11, 2020**

| State | Active cases | State | Active cases | State | Active cases | State | Active cases | State | Active cases |
|-------|--------------|-------|--------------|-------|--------------|-------|--------------|-------|--------------|
| AR    | 1            | IL    | 17           | NC    | 7            | PA    | 15           | WI    | 2            |
| AZ    | 8            | IN    | 10           | NE    | 6            | RI    | 5            |       |              |
| CA    | 190          | KS    | 1            | NH    | 5            | SC    | 9            |       |              |
| CO    | 27           | KY    | 8            | NJ    | 22           | SD    | 4            |       |              |
| CT    | 2            | LA    | 6            | NV    | 4            | TN    | 7            |       |              |
| DC    | 4            | MA    | 91           | NW    | 3            | TX    | 13           |       |              |
| FL    | 26           | MD    | 9            | NY    | 212          | UT    | 2            |       |              |
| GA    | 23           | MI    | 2            | OH    | 4            | VA    | 9            |       |              |
| HI    | 2            | MN    | 5            | OK    | 2            | VT    | 1            |       |              |
| IA    | 13           | MO    | 1            | OR    | 15           | WA    | 266          |       |              |

**March 12, 2020**

| State | Active cases | State | Active cases | State | Active cases | State | Active cases | State | Active cases |
|-------|--------------|-------|--------------|-------|--------------|-------|--------------|-------|--------------|
| AR    | 1            | IA    | 14           | MO    | 1            | NY    | 216          | UT    | 3            |
| AZ    | 8            | IL    | 23           | MS    | 1            | OH    | 5            | VA    | 10           |
| CA    | 194          | IN    | 11           | MT    | 1            | OK    | 2            | VT    | 2            |
| CO    | 34           | KS    | 1            | NC    | 9            | OR    | 21           | WA    | 342          |
| CT    | 3            | KY    | 8            | ND    | 1            | PA    | 16           | WI    | 5            |
| DC    | 10           | LA    | 13           | NE    | 10           | RI    | 5            | WY    | 1            |
| DE    | 1            | MA    | 94           | NH    | 5            | SC    | 10           |       |              |
| FL    | 27           | MD    | 12           | NJ    | 22           | SD    | 7            |       |              |
| GA    | 31           | MI    | 2            | NV    | 7            | TN    | 9            |       |              |
| HI    | 2            | MN    | 5            | NW    | 4            | TX    | 22           |       |              |

**March 13, 2020**

| State | Active cases | State | Active cases | State | Active cases | State | Active cases | State | Active cases |
|-------|--------------|-------|--------------|-------|--------------|-------|--------------|-------|--------------|
| AK    | 1            | HI    | 2            | MI    | 12           | NV    | 11           | TN    | 18           |
| AR    | 6            | IA    | 16           | MN    | 9            | NW    | 6            | TX    | 34           |
| AZ    | 8            | IL    | 30           | MO    | 2            | NY    | 421          | UT    | 5            |
| CA    | 262          | IN    | 13           | MS    | 1            | OH    | 5            | VA    | 30           |
| CO    | 72           | KS    | 4            | MT    | 1            | OK    | 3            | VT    | 2            |
| CT    | 5            | KY    | 11           | NC    | 17           | OR    | 30           | WA    | 425          |
| DC    | 10           | LA    | 44           | ND    | 1            | PA    | 22           | WI    | 7            |
| DE    | 4            | MA    | 107          | NE    | 11           | RI    | 5            | WY    | 1            |
| FL    | 48           | MD    | 12           | NH    | 6            | SC    | 12           |       |              |
| GA    | 41           | ME    | 3            | NJ    | 49           | SD    | 7            |       |              |

**March 14, 2020**

| State | Active cases | State | Active cases | State | Active cases | State | Active cases | State | Active cases |
|-------|--------------|-------|--------------|-------|--------------|-------|--------------|-------|--------------|
| AL    | 6            | HI    | 4            | ME    | 3            | NJ    | 49           | SC    | 13           |
| AR    | 9            | IA    | 17           | MI    | 25           | NM    | 10           | SD    | 8            |
| AZ    | 11           | ID    | 1            | MN    | 21           | NV    | 20           | TN    | 30           |
| CA    | 312          | IL    | 45           | MO    | 4            | NY    | 523          | TX    | 50           |
| CO    | 77           | IN    | 16           | MS    | 6            | OH    | 26           | UT    | 10           |
| CT    | 12           | KS    | 6            | MT    | 5            | OK    | 4            | VA    | 31           |
| DC    | 10           | KY    | 14           | NC    | 24           | OR    | 32           | VT    | 3            |
| DE    | 6            | LA    | 67           | ND    | 1            | PA    | 47           | WA    | 531          |
| FL    | 73           | MA    | 122          | NE    | 14           | PR    | 3            | WI    | 18           |
| GA    | 65           | MD    | 28           | NH    | 7            | RI    | 20           | WY    | 2            |

**March 15, 2020**

| State | Active cases | State | Active cases | State | Active cases | State | Active cases | State | Active cases |
|-------|--------------|-------|--------------|-------|--------------|-------|--------------|-------|--------------|
| AK    | 1            | HI    | 6            | MI    | 33           | NV    | 21           | TX    | 63           |
| AL    | 12           | IA    | 18           | MN    | 35           | NY    | 726          | UT    | 24           |
| AR    | 16           | ID    | 5            | MO    | 5            | OH    | 30           | VA    | 44           |
| AZ    | 11           | IL    | 64           | MS    | 6            | OK    | 4            | VT    | 5            |

| State | Active cases | State | Active cases | State | Active cases | State | Active cases | State | Active cases |
|-------|--------------|-------|--------------|-------|--------------|-------|--------------|-------|--------------|
| CA    | 363          | IN    | 20           | MT    | 7            | OR    | 35           | WA    | 601          |
| CO    | 100          | KS    | 7            | NC    | 32           | PA    | 47           | WI    | 27           |
| CT    | 24           | KY    | 18           | ND    | 1            | PR    | 3            | WV    | 0            |
| DC    | 16           | LA    | 89           | NE    | 17           | RI    | 20           | WY    | 3            |
| DE    | 6            | MA    | 137          | NH    | 7            | SC    | 19           |       |              |
| FL    | 111          | MD    | 31           | NJ    | 72           | SD    | 8            |       |              |
| GA    | 98           | ME    | 6            | NM    | 13           | TN    | 32           |       |              |

### March 15, 2020

| State | Active cases | State | Active cases | State | Active cases | State | Active cases | State | Active cases |
|-------|--------------|-------|--------------|-------|--------------|-------|--------------|-------|--------------|
| AK    | 1            | HI    | 7            | MI    | 53           | NV    | 44           | TX    | 82           |
| AL    | 28           | IA    | 22           | MN    | 54           | NY    | 956          | UT    | 28           |
| AR    | 22           | ID    | 5            | MO    | 6            | OH    | 50           | VA    | 51           |
| AZ    | 17           | IL    | 91           | MS    | 12           | OK    | 10           | VT    | 12           |
| CA    | 474          | IN    | 25           | MT    | 7            | OR    | 38           | WA    | 726          |
| CO    | 134          | KS    | 10           | NC    | 37           | PA    | 77           | WI    | 46           |
| CT    | 30           | KY    | 19           | ND    | 1            | PR    | 5            | WV    | 0            |
| DC    | 17           | LA    | 112          | NE    | 18           | RI    | 21           | WY    | 3            |
| DE    | 8            | MA    | 163          | NH    | 13           | SC    | 27           |       |              |
| FL    | 150          | MD    | 38           | NJ    | 173          | SD    | 9            |       |              |
| GA    | 120          | ME    | 17           | NM    | 17           | TN    | 39           |       |              |

### State-wise Statistics:

**Table S3. State-wise population, percent of uninsured population, liquid asset poverty rate, and estimated local epidemic peak arrival date**

| State | Population | Percent of Uninsured Population (%) | Liquid Asset Poverty Rate (%) | Local Epidemic Peak arrival date |
|-------|------------|-------------------------------------|-------------------------------|----------------------------------|
| AL    | 4903185    | 10                                  | 42.1                          | 6/24/20                          |
| AK    | 731545     | 12.6                                | not available                 | 6/3/20                           |
| AZ    | 7278717    | 10.6                                | 39.6                          | 6/15/20                          |
| AR    | 3017804    | 8.2                                 | 50.7                          | 6/24/20                          |
| CA    | 39512223   | 7.2                                 | 33.9                          | 6/8/20                           |
| CO    | 5758736    | 7.5                                 | 23.5                          | 6/18/20                          |
| CT    | 3565287    | 5.3                                 | 32.2                          | 6/25/20                          |
| DE    | 973764     | 5.7                                 | not available                 | 6/20/20                          |
| FL    | 21477737   | 13                                  | 47.5                          | 6/18/20                          |
| GA    | 10617423   | 13.7                                | 48                            | 6/18/20                          |
| HI    | 1415872    | 4.1                                 | not available                 | 6/12/20                          |
| ID    | 1787065    | 11.1                                | 36.6                          | 6/11/20                          |
| IL    | 12671821   | 7                                   | 33.5                          | 6/16/20                          |
| IN    | 6732219    | 8.3                                 | 37.5                          | 6/21/20                          |
| IA    | 3155070    | 4.7                                 | 27.4                          | 6/24/20                          |
| KS    | 2913314    | 8.8                                 | 38.2                          | 6/21/20                          |
| KY    | 4467673    | 5.6                                 | 38.7                          | 6/24/20                          |
| LA    | 4648794    | 8                                   | 50.6                          | 6/21/20                          |

| State | Population | Percent of Uninsured Population (%) | Liquid Asset Poverty Rate (%) | Local Epidemic Peak arrival date |
|-------|------------|-------------------------------------|-------------------------------|----------------------------------|
| ME    | 1344212    | 8                                   | 16                            | 6/23/20                          |
| MD    | 6045680    | 6                                   | 22.3                          | 6/21/20                          |
| MA    | 6892503    | 2.8                                 | 39.4                          | 6/17/20                          |
| MI    | 9986857    | 5.4                                 | 42.4                          | 6/20/20                          |
| MN    | 5639632    | 4.4                                 | 20.6                          | 6/19/20                          |
| MS    | 2976149    | 12.1                                | 54.6                          | 6/25/20                          |
| MO    | 6137428    | 9.4                                 | 37.6                          | 6/21/20                          |
| MT    | 1068778    | 8.2                                 | not available                 | 6/14/20                          |
| NE    | 1934408    | 8.3                                 | 21.1                          | 6/21/20                          |
| NV    | 3080156    | 11.2                                | 47.6                          | 6/13/20                          |
| NH    | 1359711    | 5.7                                 | not available                 | 6/8/20                           |
| NJ    | 8882190    | 7.4                                 | 26.8                          | 6/20/20                          |
| NM    | 2096829    | 9.5                                 | 46                            | 6/19/20                          |
| NY    | 19453561   | 5.4                                 | 32.1                          | 6/8/20                           |
| NC    | 10488084   | 10.7                                | 42                            | 6/19/20                          |
| ND    | 762062     | 7.3                                 | not available                 | 6/25/20                          |
| OH    | 11689100   | 6.5                                 | 34.9                          | 6/22/20                          |
| OK    | 3956971    | 14.2                                | 42.5                          | 6/23/20                          |
| OR    | 4217737    | 7.1                                 | 37.6                          | 6/8/20                           |
| PA    | 12801989   | 5.5                                 | 31.7                          | 6/21/20                          |
| RI    | 1059361    | 4.1                                 | not available                 | 6/6/20                           |
| SC    | 5148714    | 10.5                                | 42.4                          | 6/23/20                          |
| SD    | 884659     | 9.8                                 | not available                 | 6/24/20                          |
| TN    | 6829174    | 10.1                                | 46.3                          | 6/18/20                          |
| TX    | 28995881   | 17.7                                | 42.2                          | 6/18/20                          |
| UT    | 3205958    | 9.4                                 | 31.1                          | 6/16/20                          |
| VT    | 623989     | 4                                   | not available                 | 6/20/20                          |
| VA    | 8535519    | 8.8                                 | 30.6                          | 6/23/20                          |
| WA    | 7614893    | 6.4                                 | 26.7                          | 5/27/20                          |
| WV    | 1792147    | 6.4                                 | 47.6                          | 6/25/20                          |
| WI    | 5822434    | 5.5                                 | 33.7                          | 6/22/20                          |
| WY    | 578759     | 10.5                                | not available                 | 6/25/20                          |
| DC    | 705749     | 3.2                                 | not available                 | 6/20/20                          |
| PR    | 3193694    | not available                       | not available                 | 6/22/20                          |

**Table S4. State-wise demographic composition**

| State | Population aged under 69 (%) | Population aged between 70 and 79 (%) | Population aged 80 and above(%) |
|-------|------------------------------|---------------------------------------|---------------------------------|
| AL    | 88.62296                     | 7.524339                              | 3.8527                          |
| AK    | 92.95765                     | 5.067545                              | 1.97481                         |
| AZ    | 87.88952                     | 8.030611                              | 4.079872                        |
| AR    | 88.41121                     | 7.587833                              | 4.000962                        |
| CA    | 90.35337                     | 6.090015                              | 3.556618                        |
| CO    | 90.86742                     | 6.089441                              | 3.04314                         |
| CT    | 88.10969                     | 7.295282                              | 4.595029                        |
| DE    | 87.43014                     | 8.425087                              | 4.144769                        |
| FL    | 85.51038                     | 9.198451                              | 5.291168                        |

| <b>State</b> | <b>Population aged under 69 years (%)</b> | <b>Population aged between 70 and 79 years (%)</b> | <b>Population aged 80 years and above(%)</b> |
|--------------|-------------------------------------------|----------------------------------------------------|----------------------------------------------|
| GA           | 90.87946                                  | 6.21878                                            | 2.901761                                     |
| HI           | 87.43568                                  | 7.661858                                           | 4.90246                                      |
| ID           | 89.52593                                  | 7.060964                                           | 3.413107                                     |
| IL           | 89.45625                                  | 6.601481                                           | 3.942264                                     |
| IN           | 89.47237                                  | 6.73905                                            | 3.788578                                     |
| IA           | 88.36755                                  | 6.997999                                           | 4.634451                                     |
| KS           | 89.28461                                  | 6.560387                                           | 4.154999                                     |
| KY           | 89.13332                                  | 7.184783                                           | 3.681898                                     |
| LA           | 89.79506                                  | 6.688765                                           | 3.516175                                     |
| ME           | 86.23196                                  | 8.907998                                           | 4.860042                                     |
| MD           | 89.67587                                  | 6.636484                                           | 3.687645                                     |
| MA           | 88.81725                                  | 6.953139                                           | 4.22961                                      |
| MI           | 88.54884                                  | 7.351483                                           | 4.099675                                     |
| MN           | 89.39046                                  | 6.57352                                            | 4.036015                                     |
| MS           | 89.38353                                  | 6.984092                                           | 3.632376                                     |
| MO           | 88.55039                                  | 7.280364                                           | 4.169248                                     |
| MT           | 87.74552                                  | 8.052207                                           | 4.202277                                     |
| NE           | 89.40769                                  | 6.448508                                           | 4.1438                                       |
| NV           | 88.12391                                  | 8.754637                                           | 3.121449                                     |
| NH           | 88.00066                                  | 7.782696                                           | 4.216644                                     |
| NJ           | 88.92509                                  | 6.867774                                           | 4.207141                                     |
| NM           | 88.33098                                  | 7.688501                                           | 3.980523                                     |
| NY           | 88.76038                                  | 6.916455                                           | 4.32317                                      |
| NC           | 89.12478                                  | 7.233566                                           | 3.641659                                     |
| ND           | 89.55895                                  | 6.039783                                           | 4.401265                                     |
| OH           | 88.53654                                  | 7.230345                                           | 4.233119                                     |
| OK           | 89.34523                                  | 6.902068                                           | 3.752702                                     |
| OR           | 88.4167                                   | 7.701553                                           | 3.88175                                      |
| PA           | 87.5246                                   | 7.653513                                           | 4.821887                                     |
| RI           | 88.22215                                  | 7.151227                                           | 4.626625                                     |
| SC           | 88.24506                                  | 8.080561                                           | 3.674377                                     |
| SD           | 89.03988                                  | 6.637234                                           | 4.322884                                     |
| TN           | 89.02842                                  | 7.32668                                            | 3.644899                                     |
| TX           | 91.72226                                  | 5.460938                                           | 2.816805                                     |
| UT           | 92.69322                                  | 4.820941                                           | 2.48584                                      |
| VT           | 87.24715                                  | 8.345375                                           | 4.407479                                     |
| VA           | 89.63804                                  | 6.826139                                           | 3.53582                                      |

| State | Population aged under 69 years (%) | Population aged between 70 and 79 years (%) | Population aged 80 years and above(%) |
|-------|------------------------------------|---------------------------------------------|---------------------------------------|
| WA    | 89.88078                           | 6.704331                                    | 3.414888                              |
| WV    | 86.69987                           | 8.722295                                    | 4.577834                              |
| WI    | 88.71103                           | 7.079336                                    | 4.209635                              |
| WY    | 89.30448                           | 7.05996                                     | 3.635564                              |
| DC    | 91.84019                           | 5.059256                                    | 3.100554                              |
| PR    | 85.21589                           | 9.372603                                    | 5.411509                              |

**Calculation of Age Weighed Mortality Rate:**

Wu and McGoogan (9) reported the case fatality rate (CFR) of COVID-19 based upon the confirmed cases in China, as outlined in Table S5.

**Table S5. Case fatality rate of COVID-19 as a function of patients age**

| Patient group             | Number of confirmed cases | Number of death | CFR (%) |
|---------------------------|---------------------------|-----------------|---------|
| All                       | 44672                     | 1023            | 2.3     |
| Patients aged 70-79 years | 3918                      | 312             | 8.0     |
| Patients aged ≥ 80 years  | 1408                      | 208             | 14.8    |

Based on the reported statistics, the CFR for patients aged below (and including) 69 years can be calculated as:  $CFR_{\leq 69} = (1023 - 312 - 208)/(44672 - 3918 - 1408) \approx 1.3\%$ . Next the age weighted mortality rate for state  $n$  can be calculated per:

$$Mortality\ rate_n = CFR_{\leq 69}f_{\leq 69,n} + CFR_{70-79}f_{70-79,n} + CFR_{\geq 80}f_{\geq 80,n},$$

Where  $f_{\leq 69,n}$ ,  $f_{70-79,n}$ , and  $f_{\geq 80,n}$  are respectively the percent of population aged under (including) 69 years, between 70 and 79 years, and above (including) 80 years for state  $n$ .

**References:**

1. Air Carrier Statistics. Bureau of Transportation Statistics. [https://www.transtats.bts.gov/Tables.asp?DB\\_ID=111](https://www.transtats.bts.gov/Tables.asp?DB_ID=111)
2. United States Census Bureau. State Population. <https://www.census.gov/data/datasets/time-series/demo/popest/2010s-state-total.html>
3. United States Census Bureau. State Demographic Composition. <https://factfinder.census.gov/faces/tableservices/jsf/pages/productview.xhtml?src=bkmk>
4. United State Census Bureau. Health Insuration Coverage in the United States: 2018 <https://census.gov/library/publications/2019/demo/p60-267.html>
5. Prosperity Now Scorecard <https://scorecard.prosperitynow.org/data-by-issue#finance/outcome/liquid-asset-poverty-rate>
6. E. Dong, H. Du, L. Gardner. The Lancet Infectious Diseases. (2020)
7. American Travel Survey. Bureau of Transportation Statistics. <https://www.bts.gov/browse-statistical-products-and-data/surveys/american-travel-survey>
8. D. Brockmann, D. Helbing, The hidden geometry of complex, network-driven contagion phenomena. *Science* **342**, 1337-1342 (2013).
9. Z. Wu, J.M. McGoogan. Characteristics of and Important Lessons From the Coronavirus Disease 2019 (COVID-19) Outbreak in China: Summary of a Report of 72 314 Cases From the Chinese Center for Disease Control and Prevention. *JAMA*. (2020)
